# Supplementary material for: Population Genetics of California Gray Foxes Clarify Origins of the Island Fox
Source: MDPI journal article supplement (doi:10.3390/genes13101859), 2022-10-14
Supplement: s1 [file s1]

**Supplementary Table S2.** Primer sequences for 20 loci used for gray foxes (*Urocyon cinereoargenteus*) and island foxes (*U. littoralis*), along with reaction concentrations (same for forward, F, and reverse, R, primers), fluorescent dyes, multiplex sets, species for which primers were originally designed, and references.

| Set | Locus     | Conc.<br>( $\mu$ M) | Dir. | Dye  | Primer sequence            | Species          | Ref. |
|-----|-----------|---------------------|------|------|----------------------------|------------------|------|
| 1   | CXX-402   | 0.42                | F    | PET  | GGGTAATTCATCCAGTGCCTT      | <i>V. vulpes</i> | a    |
|     |           |                     | R    |      | TATGCAAACATGCAAACATGC      | <i>V. vulpes</i> | a    |
| 1   | AHT-142   | 0.50                | F    | PET  | AAGCAGATCCTAGAGCAGCA       | <i>V. vulpes</i> | a    |
|     |           |                     | R    |      | CCCCACAGTTTAGAAATATCTGC    | <i>V. vulpes</i> | a    |
| 1   | REN105L03 | 0.42                | F    | VIC  | GGTGCCTGACAAGATGGAAT       | <i>V. vulpes</i> | b    |
|     |           |                     | R    |      | GAGATTGCTGCCCTTTTACT       | <i>V. vulpes</i> | b    |
| 1   | CPH18     | 0.42                | F    | 6FAM | CAGAGATACGTCTTGACACTAGCAGA | Dog              | c    |
|     |           |                     | R    |      | GGCCATTCTGAAACACTTG        | <i>V. vulpes</i> | b    |
| 1   | CPH8      | 0.84                | F    | NED  | TGCTCAATTGATTAGTCCGTCT     | <i>V. vulpes</i> | b    |
|     |           |                     | R    |      | TAGATTTGATACCTCCCTGAGTCC   | Dog              | c    |
| 1   | REN54P11  | 0.42                | F    | PET  | TCCCTCTGGCTCAGTTAGAA       | <i>V. vulpes</i> | b    |
|     |           |                     | R    |      | ATCAGCATCACCTGGGAACA       | <i>V. vulpes</i> | b    |
| 1   | FH2001    | 1.00                | F    | 6FAM | TCCTCCTCTTCTTTCCATTGG      | Dog              | d    |
|     |           |                     | R    |      | TGCATTCTTCTTG CATGCTT      | <i>V. vulpes</i> | b    |
| 2   | CPH2      | 0.67                | F    | NED  | TTCTGTTGTTATTGGCACCA       | <i>V. vulpes</i> | b    |
|     |           |                     | R    |      | TTCTTGAGAACAGTGCCTTCG      | Dog              | c    |
| 2   | FH2088    | 0.17                | F    | VIC  | CCCTCTGCCTACATCTCTGC       | Dog              | d    |
|     |           |                     | R    |      | TAGGGCATGCATATAACCAGC      | Dog              | d    |
| 2   | REN162C04 | 0.50                | F    | VIC  | AAAATCAGCATTATTCTTTCCACA   | <i>V. vulpes</i> | b    |
|     |           |                     | R    |      | TGGCTGTATTCTTTGGCACA       | Dog              | e    |
| 2   | AHT-171   | 0.59                | F    | PET  | AGGTGCAGAGCACTCACTCA       | Dog              | f    |
|     |           |                     | R    |      | CCTCAAACCCAGGTGAAGC        | <i>V. vulpes</i> | b    |
| 2   | INU055    | 0.50                | F    | NED  | CCAGGTGTCCCTATCCATCT       | <i>V. vulpes</i> | b    |
|     |           |                     | R    |      | GCACCACTTTGGGCTCCTTC       | Dog              | g    |
| 2   | FH2010    | 0.25                | F    | 6FAM | AAATGGAACAGTTGAGCATGC      | Dog              | d    |
|     |           |                     | R    |      | CCCCTTACAGCTTCATTTTCC      | Dog              | d    |
| 2   | FH2004    | 0.17                | F    | VIC  | CTAAGTGGGGAGCCTCCTCT       | Dog              | d    |
|     |           |                     | R    |      | ACTGTGACCTACTGAGGTTGCA     | Dog              | d    |
| 3   | CXX0279   | 0.50                | F    | PET  | TGCTCAATGAAATAAGCCAGA      | <i>V. vulpes</i> | b    |
|     |           |                     | R    |      | GAATTTGATTACTCTGGAAAACCTCC | <i>V. vulpes</i> | b    |
| 3   | INU030    | 0.42                | F    | 6FAM | GGCTCTGTGCTCAAGTCTGT       | <i>V. vulpes</i> | b    |
|     |           |                     | R    |      | CATTGAAAGGGAATGCTGGT       | Dog              | g    |
| 3   | AHT-137   | 0.50                | F    | VIC  | TACAGAGCTCTTAAGTGGGTCC     | Dog              | h    |
|     |           |                     | R    |      | CCTTGCAAAGTGTCAATTGCT      | Dog              | h    |
| 3   | FH2054    | 0.25                | F    | NED  | GCCTTACTCATTGCAGTTAGGG     | <i>V. vulpes</i> | b    |
|     |           |                     | R    |      | ATGCTGAGTTTTGAACTTTCCC     | Dog              | d    |

|   |         |      |   |      |                      |                  |   |
|---|---------|------|---|------|----------------------|------------------|---|
| 3 | C01.424 | 0.25 | F | PET  | AGCTTAGCTTACTGCCCTGG | Dog              | i |
|   |         |      | R |      | TCCTTTGGTTTTTAGCAGGG | Dog              | i |
| 3 | C08.618 | 0.42 | F | 6FAM | CAACCCAGGGTGGAAGC    | Dog              | i |
|   |         |      | R |      | GCCCAGAATCCATTGAGAAA | <i>V. vulpes</i> | b |

## References

- a - Wandeler P, Funk SM (2005) Short microsatellite DNA markers for the red fox (*Vulpes vulpes*). *Molecular Ecology*, 6, 98-100.
- b - Moore M., S. K. Brown, B. N. Sacks. 2010. Thirty-one short red fox (*Vulpes vulpes*) microsatellite markers. *Molecular Ecology Resources* 10:404-408.
- c - Fredholm M, Winterø AK (1995) Variation of short tandem repeats within and between species belonging to the Canidae family. *Mammalian Genome*, 6, 11-18.
- d - Francisco L.V., Langston A.A., Mellersh C.S., Neal C.L. & Ostrander E.A. (1996) A class of highly polymorphic tetranucleotide repeats for canine genetic mapping. *Mammalian Genome* 7, 359–62.
- e - Breen M, Jouquand S, Renier C, et al (2001). Chromosomespecific single-locus FISH probes allow anchorage of an 1800-marker integrated radiation-hybrid/linkage map of the domestic dog genome to all chromosomes. *Genome Research*, 11,1784-1795.
- f - Ostrander EA, Sprague GF, Rine J (1993) Identification and Characterization of dinucleotide repeat (CA)<sub>n</sub> markers for genetic mapping in dog. *Genomics*, 16, 207-213.
- g - Ichikawa Y, Takahashi S, Tsumagari M, et al (2002) Identification a 112 nd characterization of 40 dinucleotide microsatellites in the dog genome. *Animal Genetics*, 3, 400-402.
- h - Holmes NG, Dickens HF, Parker HL Binns MM, Mellersh CS, Sampson J (1995) Eighteen canine microsatellites. *Animal Genetics*, 26, 132-133.
- i - Ostrander, E.A., Mapa, F., Yee, M., Rine, J. (1995). One hundred new simple sequence repeat-based markers for the canine genome. *Mamm. Genome* 6, 192-195.
